---

# Modeling unitary fields and the single-neuron contribution to local field potentials in the hippocampus

Maria Teleńczuk<sup>1</sup>, Bartosz Teleńczuk<sup>1</sup>, Alain Destexhe<sup>1</sup>,

**1 Paris-Saclay Institute of Neuroscience (NeuroPSI), Centre National de la Recherche Scientifique, 91198 Gif-sur-Yvette, France**

## Abstract

Synaptic currents represent a major contribution to the local field potential (LFP) in brain tissue, but the respective contribution of excitatory and inhibitory synapses is not known. Here, we provide estimates of this contribution by using computational models of hippocampal pyramidal neurons, constrained by in vitro recordings. We focus on the unitary LFP (uLFP) generated by single neurons. We first reproduce experimental results for hippocampal basket cells, and in particular how inhibitory uLFP are distributed within hippocampal layers. Next, we calculate the uLFP generated by pyramidal neurons, using morphologically-reconstructed CA3 pyramidal cells. The model shows that the excitatory uLFP is of small amplitude, smaller than inhibitory uLFPs. Indeed, when the two are simulated together, inhibitory uLFPs mask excitatory uLFPs, which might create the illusion that the inhibitory field is generated by pyramidal cells. These results provide an explanation for the observation that excitatory and inhibitory uLFPs are of the same polarity, in vivo and in vitro. These results also show that somatic inhibitory currents are large contributors of the LFP, which is important information to interpret this signal. Finally, the results of our model might form the basis of a simple method to compute the LFP, which could be applied to point neurons for each cell type, thus providing a simple biologically-grounded method to calculate LFPs from neural networks.

---

## Introduction

The local field potential (LFP) recorded from the hippocampus is rich in various waveforms during different network states. Sharp waves [7], ripples [9, 44], theta [6, 8], gamma [10] are different types of waveforms found in the LFP. These patterns of activity are population phenomenon, which requires synchronised contributions of large number of neurons. However, it was not until 2009 [13] and 2010 [2] that researchers showed that the LFP not only reflects synchronized network behavior, but also the field produced by just a single basket cell activity in the rat hippocampus *in vitro*. Previously field triggered by single neuron (called unitary field potential or uLFP) was thought to be of too small amplitude to be recordable above the noise level [33]. Why is hippocampal basket cell so special then? The axon of a basket cell does not extend very far from the cell body (soma) and it targets mostly the bodies and proximal dendrites of nearby pyramidal cells. In the hippocampus, pyramidal cell somas are packed in a single layer called stratum pyramidale, leading to the axon of a basket cell to form what appears to be the shape of a basket (hence the name). The synaptic currents induced in the postsynaptic population are therefore clustered in space, which allows for easy addition of the signal.

However, in 2017 Telenczuk et al showed [37] that not only in the hippocampus but also in the neocortex *in vivo* in human and in monkey, it is possible to extract unitary fields generated by not only single inhibitory but also by single excitatory neurons. Surprisingly, however, the two signals were of the same polarity despite being generated by currents of opposite sign. Moreover, there was a systematic time lag between them, with excitatory fields peaking later than inhibitory fields. It was hypothesised that excitatory uLFPs may be in fact di-synaptic inhibitory uLFPs: when a single pyramidal neuron fires, it induces the firing of inhibitory neurons which in turn generate the uLFPs. It is very likely that the same happens in the hippocampus where the pyramidal neuron-basket neuron connections are known to be very reliable [29].

In the present paper, we seek for plausible mechanisms to explain these observations, considering the hippocampus. We first reproduced the basket cell *in vitro* experiments in the model. We show that, indeed the extent of the axon of a basket cell creates high likelihood for triggering relatively large extracellular fields. We show how this signal spreads within different hippocampal layers. Next, we repeat the same simulations for two pyramidal cells with very different axon reach. Here, we show that the excitatory uLFP *in vitro* is of much smaller

---

amplitude than the inhibitory uLFP, although the exact location and size will depend on the axon extent and where it is cut during the slicing procedure. Finally, we check if the hypothesis of Telenczuk et al [37] is also correct for the hippocampal data. By superimposing the excitatory uLFP with inhibitory uLFP after short delay we show that, indeed, the excitatory uLFP is being masked, leading to a pyramidal cell-triggered inhibitory field. Finally, we propose that uLFPs calculated by our model might form the basis of phenomenological models of the LFP, by convolving the generated spiking activity of point-neuron models with calculated unitary fields for specific cell types in space and time. This in turn will enable for better and faster understanding of recorded local field potentials.

## Materials and Methods

Our model was written in Python 2.7 and used the Neuron Simulator [18] for simulations of the postsynaptic neurons and the NeuronEAP python library [38] for calculations of the local field potential.

### Size of the slice

The soma of the presynaptic cell was assumed to be at coordinate (0,0,0). The slice size extended from -500 to 500  $\mu m$  in length, -500 to 800  $\mu m$  in height and -200 to 200  $\mu m$  in width (commonly used slice width in experimental studies interested in measuring local field potential [2, 26]). Somas of postsynaptic cells were placed throughout the length and the width of the slice and within -40 to 40  $\mu m$  in height direction (ie. pyramidal cell layer).

### Postsynaptic population

To model the postsynaptic population, we inspected multiple CA3 pyramidal cell morphologies which were reconstructed from the rat hippocampus and which we downloaded from *neurmorpho.org* online database. This inspection was done in two ways: (i) visually, where we checked if the neurons did not look flatten and if the overall dendritic tree appeared uninjured (Fig. 1A), and (ii) quantitatively, where we monitored the change of size in diameter of the dendrites making sure that it decreased with the distance from the soma (Fig. 1B) as the diameter of the dendrites is of crucial importance for calculating the correct extracellular

---

field. We decided to take all the selected reconstructions from the database 68  
of a single lab, which we chose to be the one of Amaral [20]. This selection 69  
process led us to 20 distinct CA3 pyramidal cell morphologies which we then 70  
translated vertically, with apical dendrites facing up (Fig. 1A). We randomly 71  
drew the morphologies from the pool of those 20 preselected cells to form the 72  
postsynaptic population. The morphologies remained passive throughout the 73  
simulations. We decided to use only morphologies of pyramidal neurons as they 74  
form the largest postsynaptic population, other connections are mostly made to 75  
CA1 neurons [4, 12, 24, 42]. 76

## Synaptic input 77

Next, we placed synapses on each of the postsynaptic neuron. Parameters and 78  
number of the synapses (Table 1) differed for the two presynaptic cell types and 79  
were in the agreement with the literature. All postsynaptic neurons received at 80  
least one synapse; further synapses were added with probabilities indicated in 81  
the Table 1. 82

The amplitudes and time constants of simulated synaptic currents are also 83  
given in Table 1. Synaptic current is usually measured from the soma, which is 84  
not a problem in case of the basket cells, which place their synapses in the soma. 85  
However, it may cause discrepancies in case of input from pyramidal neurons 86  
which place their synapses far from the soma. To account for this we used the 87  
values calculated for the current at the dendrite as given in the paper of Guzman 88  
and colleagues [15]. 89

## Calculation of the local field potential 90

To calculate local field potential generated by activation of the synapses on each 91  
neuron in space, we used the NeuronEAP python library [38] which is based 92  
on linear source approximation [19, 41]. Figure 1C shows an example of local 93  
field potential for two randomly placed inhibitory (left) and excitatory (right) 94  
synapses. The current at each of the synapse is plotted in Fig. 1D. 95

---

**Table 1. Cell parameters.** Parameters used for modelling of basket cell (inhibitory) and pyramidal neuron (excitatory) together with the references to the original measurements. If under 'excitatory' column there are two different numbers given, first number is used for Cell A and the second for Cell B

| <b>name</b>                               | <b>inhibitory</b>  | <b>excitatory</b> |
|-------------------------------------------|--------------------|-------------------|
| # of postsynaptic cells                   | 1000 [22,30]       | 1600, 2210        |
| total # of synapses placed                | 3435               | 2282, 2953        |
| # of synapses on each target              | 1–6 [14,22]        | 1–2 [15]          |
| probability of creating each next synapse | 0.5                | 0.42 [15]         |
| membrane potential                        | -70 mV             | -57 mV [23]       |
| propagation velocity in the axon          | 0.5 m/s            | 0.45 m/s [27]     |
| synapse reversal potential                | -75 mV [1, 5, 40]  | 0 mV              |
| synapse rising tau                        | 0.45 ms [1, 2, 30] | 0.26 ms [16]      |
| synapse decaying tau                      | 1.2 ms [1, 2, 30]  | 6.71 ms [16]      |
| maximum synapse conductance               | 5 nS [1]           | 0.54 nS [15]      |
| external resistivity                      | 3.5 $\Omega.m$     | 3.5 $\Omega.m$    |

## Results

96

### Inhibitory Unitary Field Potential

97

First, we reproduced published experimental results of Bazelot and colleagues [2] in the model. We placed 1000 pyramidal cells in space to mimick the slice configuration [30] (as indicated in Materials and Methods; location of the somas of the postsynaptic cells: Fig 2A). Next we created at least one and maximum of six inhibitory synapses on each of the cells. The highest probability of creating a synapse was within the pyramidal cell layer or, within stratum lucidum [30]. Throughout the length of the slice the probability decreased with the distance from the body of the presynaptic cell with a gaussian profile. The exact location of the synapses is indicated by red dots in Fig. 2B. Red histograms show the distribution of the synapses throughout the length of the slice (Fig 2B top histogram) and throughout the hippocampal layers (Fig 2B histogram on the right). Four randomly chosen morphologies of postsynaptic neurons with somas represented by black dots were also drawn to give an idea of the spread of dendritic trees through the layers (Fig 2B).

98

99

100

101

102

103

104

105

106

107

108

109

110

111

Next, we simulated the activation of the synapses and we calculated how the generated current spreads through the cells and in the extracellular space. From those currents we calculated the LFP within 10 ms of the simulation time. An example of LFP (1.5 ms after the activation of the closest synapses) is shown in

112

113

114

115

---

Fig. 2C. The LFP is shown across different layers of the hippocampus: stratum lacunosum moleculare (St l mol), stratum radiatum (st rad), stratum lucidum (st luc), stratum pyramidale (st pyr) and stratum oriens (st o). Not surprisingly, the potential of the highest amplitude is recorded around the location of the synapses. Columns of stars marked a–d represent the location of the array of electrodes placed along the hippocampal layers. Each electrode in an array is numbered 0-19. Such recordings of local field potential in the CA3 area of the hippocampus *in vitro* have been previously performed experimentally using 8 electrodes [2, 3]. The traces obtained from each electrode are shown in Fig. 2D. Their amplitude decreases with the distance of the presynaptic neuron with agreement to Bazelot (2010) [2]. The location of the electrode has an influence on the amplitude and deflection of the recorded signal. Finally, we calculated current source density analysis which clearly shows the source of the current in the pyramidal cell layer and nearby.

Next, to compare our findings with the published experimental results we selected one of the largest signals (array a, electrode 7) and we measured its amplitude, and time from the beginning of the rise to the peak of the signal (Fig 3A). In the paper of Bazelot and colleagues [2] the mean amplitude of the recorded signal was  $28.1 \mu V$  whereas recording from our largest waves was  $36.7 \mu V$ . Although, Bazelot and colleagues did not specify rise-to-peak time, the timings read from their figures are similar (1.53 ms in the Fig. 3A). After that, we checked how the location of the maximum and minimum peak of the signal varies depending on the location of the electrode in different layers. To this extent we took measurements from all the electrodes in the electrode array and we checked for the maximum and minimum in time. The time of the peaks varied largely depending where the electrode was placed (Fig 3B). Finally we measured the peak to peak deflection throughout different layers, distribution of which we show in Fig 3C. It shows how the amplitude and the deflection of the measured signal might change with just a very slight shift of the electrode within the hippocampal layers.

### Excitatory unitary field potential (exc-uLFP)

Axonal trees of pyramidal neurons are very different from those of basket cells. They tend to be very long (200  $\mu m$  for CA3b to 500  $\mu m$  for CA3c pyramidal neuron [34], as compared to 900–1300  $\mu m$  in basket cell [22]) and longitudinal projections of single axons can extend very far (even 70% of the dorso-ventral

---

extent of the hippocampus) [24, 25, 36].

To model uLFPs produced by single pyramidal neurons of CA3 area, we searched the NeuroMorpho.org online database for best preserved pyramidal cell axons from the rat. We selected two cells: one with *NeuroMorpho.Org* ID: NMO\_00187 [39] which we will call Cell A (Fig. 4A left) and second cell with *NeuroMorpho.Org* ID: NMO\_00931 [35], which we will call Cell B (Fig. 4A right). Next, we rotated them so that the dendritic tree was oriented vertically and we calculated the length of the axon in each  $50\mu\text{m} \times 50\mu\text{m}$  bins. Blue histograms in Fig. 4A left and right show the total length of the axon within  $50\mu\text{m}$  bin in each axis (and summed across other axes) for Cell A and Cell B respectively (the length of the axon in the z-direction is not shown). Axon is drawn in blue and the location of the soma is indicated by the red star. Next, we cut the axon to the slice of size:  $-500\mu\text{m}$  to  $500\mu\text{m}$  from the soma of the presynaptic pyramidal cell in x-direction and by  $-500\mu\text{m}$  to  $800\mu\text{m}$  in y-direction and by  $-200\mu\text{m}$  to  $200\mu\text{m}$  in z-direction. The extend of the slice in two directions is shown by green rectangle and the remaining length of the axon by green histograms in Fig. 4A. We calculated total length of the axons by adding all the measurements from all the bins. Total length of the axon of Cell A was 468.57 mm, after the cutting only 11.16 mm remained (being around 2% of the original axon). Total length of the axon of Cell B was 205.17 mm, after cutting 14.12 mm remained (around 7% of the original axon). By giving this numbers we want to emphasize how little fraction of the pyramidal cell axon remains in the experimental slice. This has been also pointed out previously [21].

It is known that inter-varicosities distance on the CA3 pyramidal axon is on average  $4.7\mu\text{m}$  [24, 36, 43]. We combined this information with the calculated length of the axon to estimate the probability of placing a synapse within each  $50\mu\text{m}$  bin. Total number of synapses placed by Cell A should be around 2400 and placed by Cell B it should be around 3000. CA3 pyramidal neuron in 58% cases places 1 synapse on its postsynaptic target and in remaining 42% cases it places 2 synapses [16]. Therefore we created the postsynaptic cell population of cell A to be 1600 and of cell B to be 2210 cells. We gave the probability of placing a synapse matching the distribution of the cut axon, by doing so we ended up with the synapse distribution as indicated by green dots and green histograms in Fig. 4B (left and right for Cell A and B respectively). Cell A placed 2282 synapses and Cell B placed 2953 synapses on its postsynaptic targets.

Next, we calculated local field potential generated by the two neurons. The snapshot of those calculations at time 5.5 ms from the beginning of the simulation

---

is depicted in Fig. 4C (Cell A, left; and Cell B, right). Here, we placed 4 electrode arrays at  $-200\ \mu\text{m}$ ,  $0\ \mu\text{m}$ ,  $100\ \mu\text{m}$  and  $300\ \mu\text{m}$  from the presynaptic cell body (stars in Fig. 4C indicated by a–d) because due to the non-symmetric axon, the synapse distribution is also non-symmetric. Unitary field potentials recorded by each of the electrodes (Fig 4D) differ largely from those recorded by activation of basket cell synapses. As expected, the distribution of uLFPs depends on the shape and the extent of the axon. uLFPs for cell A reaches amplitude no larger than  $10\ \mu\text{V}$ . However, at st pyramidale where recordings are most frequently performed the uLFPs are of amplitude near  $0\ \mu\text{V}$  (peak-to-peak in electrode 7 array b is  $2.2\ \mu\text{V}$ ), with the highest amplitude (up to  $8\ \mu\text{V}$  in peak to peak measurements in the array b, and  $8.53\ \mu\text{V}$  in el 4, array a) in the distant layers such as stratum radiatum and stratum oriens (Fig 4D). The uLFP generated by cell B is of different distribution. Here, the signal is comparably large in the pyramidal cell layer, even though the strongest signal can be found in st oriens and towards the left part of the slice (Fig 4D a right,  $200\ \mu\text{m}$  away from the soma of the presynaptic cell). However, even the highest uLFP is still of the amplitude not larger than  $9\ \mu\text{V}$ .

Finally, we checked the timing of the highest and lowest uLFP peaks within different layers of the hippocampus at location  $0\ \mu\text{m}$  from the presynaptic cell body (Fig 5A). The time of the absolute maximum peaks differed by as much as 6 ms depending on the location of the measurement. The profile of the peak-to-peak deflection differed between the two cells (Fig 5B left, Cell A; right Cell B) and it changed across the different layers.

We conclude that for the two pyramidal neurons the uLFP might prove difficult to measure experimentally *in vitro*. One would need to place an extracellular electrode in the correct location which differs from cell to cell.

## Masking of excitatory uLFP with inhibitory uLFP

Pyramidal cells form only few synapses on their basket cell targets, however, those connections are known to be very reliable [29]. Recently, Telenczuk and colleagues proposed that the unitary fields triggered by the activation of the excitatory neurons which we recorded from the human and monkey neocortex were in-fact bi-synaptic inhibitory unitary fields [37]. We believe that this might also be true in the hippocampus. To check if this is indeed plausible, we superimposed the excitatory uLFPs generated by Cell A and Cell B with the inhibitory uLFP after a 3 ms time delay (Fig. 6) [29, 31]. The local field potential at 5.5 ms



---

after the beginning of the simulations shows much stronger contribution of the  
inhibitory uLFP with very strong positive field around stratum pyramidale (Fig  
6A). The recordings from the a–d electrode arrays reveal very minor excitatory  
uLFP contribution compared to the strong inhibitory uLFP contribution (Fig 6).  
Our results show that, indeed it might be difficult to separate excitatory uLFP  
from the inhibitory one without use of manipulations that would block specific  
cell types. Please also note that in our model both inhibitory and excitatory  
neurons are located at (0,0,0) coordinate therefore the signal is strong for both.  
However, in the real recordings it is more likely that the somas will be shifted.

## Discussion

In this paper, we have used numerical simulations of morphologically-reconstructed  
neurons to investigate the single neuron contribution to local field potentials,  
the so-called unitary local field potentials or uLFPs. In agreement with previous  
studies in hippocampus [2, 13] and neocortex [37], we found that inhibitory  
uLFPs are of larger amplitude than excitatory uLFPs. Consequently, the LFP  
signal is expected to be dominated by inhibitory currents. We discuss below  
these findings, their significance and what perspectives they offer for further  
work.

Our biophysical model was based on reproducing published experimental  
results [2] of inhibitory unitary field in the hippocampal CA3 slice from the  
rat. Next, we used the same model to find out what is the excitatory unitary  
field produced by pyramidal neurons in the same area. We show that pyramidal  
neurons also produce unitary field potentials, however of much smaller amplitude  
and of very different spatial profile which depends on their exact axonal archi-  
tecture. Due to limited computational resource constraints we were unable to  
calculate the field generated by the full pyramidal cell axon (*in vivo* condition).  
However, if such resources are available, it would be of interest to check if the  
excitatory uLFP remains of the same amplitude if the whole axon morphology  
is considered.

By comparing the two types of uLFPs, we found that it is likely that the  
excitatory uLFP is further masked by the inhibitory uLFP triggered by pyramidal–  
basket cell interaction.

The explanation for the dominance of inhibitory uLFPs is based on the  
particularities of the pyramidal cell morphology. Excitatory synapses, which are

---

located exclusively in apical, oblique and basal dendrites, produce single-synapse LFPs which are of various polarities, according to their positions [11,14,28]. For example, basal dendrite synapses and apical synapses will produce dipoles of opposite polarity, so will partially cancel. This cancellation explains why the uLFP of excitatory synapses is of relatively small amplitude. Inhibitory synapses on pyramidal cells also contact the various parts of the dendrites and will suffer from the same cancelling effect. However, inhibitory synapses have in addition a very high density in the perisomatic region, which not only causes strong inhibition, but it also forms always the same dipole. These dipoles on each pyramidal cell sum up, and yield a uLFP of larger amplitude. This explanation is supported by our computational models.

In addition, we showed that the axon morphology of pyramidal neurons has a critical influence on the uLFP recorded along the radial and lateral axes (Fig. 4). The morphologies of the axon can vary drastically across neurons, which in turn determines the final distribution of the synapses on their target cells. Importantly, most slice preparations cut significant part of the axonal arbor leading to a pronounced decrease in the number of synaptic terminals, which could additionally weaken the effect of pyramidal neurons on the LFP compared to the inhibitory neurons.

Inhibitory neurons are generally thought not to contribute to the LFP due to their spherical symmetry which generates a closed-field geometry that produces little electric field (Lorente de No). This argument holds mainly for the far-field potentials recorded on the surface of the brain (electrocorticography, ECoG) or from the scalp (electroencephalography). Here, we show that inhibitory neurons contribute significantly to the LFP. This can be explained by two arguments. First, we study here local potentials (LFP) that are recorded very close to the current source, such that the far-field approximation does not hold. Secondly, and most importantly, we consider the post-synaptic contribution of the neurons, which does not depend on the shape of dendritic shape of the pre-synaptic inhibitory neurons, but rather on the reach of their axonal arbor and the morphology of the post-synaptic neuron. This change of paradigm from pre-synaptic to post-synaptic view has a very important consequences for the interpretation of the LFP in terms of activities of specific neuron types and the modelling of these signals.

Although in this post-synaptic paradigm, pyramidal neurons contribute little to the LFP, their contribution can be still visible through the bi-synaptic mechanism. In fact, the synapses of pyramidal neurons on basket cells are

---

strong [29] so single action potentials of pyramidal neurons can activate reliably 294  
some basket cells. These, in turn, can produce measurable LFP that will be 295  
associated with the action potentials of the pyramidal neurons. Our model 296  
shows that this bi-synaptic mechanism can lead to a measurable contribution of 297  
pyramidal neurons to the LFP. 298

These findings help with the correct interpretation of the LFP signal. Not 299  
only the present modeling study provides a mechanistic explanation for previous 300  
experimental results, but it also suggests a new interpretation of the LFP signal. 301  
Because the LFP signal in the tissue is a sum of each neuron's contribution 302  
(uLFPs), our model predicts that the LFP mostly reflects the inhibitory currents 303  
in pyramidal cells. 304

One limitation of the present study is that it does not include include the 305  
LFP contribution of synaptic currents in inhibitory neurons. However, these 306  
neurons are mostly symmetric, so that the dipolar contribution is limited. It also 307  
does not include the possible contribution of intrinsic currents such as  $I_h$  [32] or 308  
 $K^+$  conductances 309

Finally, our approach provides a new way to calculate the LFP from networks 310  
of point neurons. Previously Hagen and colleagues [17] proposed calculating LFP 311  
generated from point neuron models by using their `hybridLFPy` set of Python 312  
classes. Their approach give good estimation of the field potential, however it 313  
requires separate calculation of the field from the same number of neurons as in 314  
the original model. Here, we propose alternative approach which for the same 315  
type of models should give less precise but faster estimation of the field. In our 316  
model we calculate local field potential for only some representative neurons from 317  
each neuron type. We then propose to superimpose those unitary fields with the 318  
spiking activity of each point neuron type locating them in space. Those fields 319  
can be then summed linearly. The estimation of the field should be sufficient 320  
for better understanding of network activity (for example sharp waves in the 321  
hippocampus). This application will be developed in further work. 322

## Acknowledgments 323

This work was supported by Centre National de la Recherche Scientifique 324  
(CNRS, France), the European Community Future and Emerging Technologies 325  
program (The Human Brain Project, H2020-720270 and H2020-785907), the 326  
ANR PARADOX, and the ICODE excellence network. We would also like to 327

---

thank Jose Donoso for valuable discussions.

328

## Figures

329

## References

330

1. M. Bartos, I. Vida, M. Frotscher, A. Meyer, H. Monyer, J. R. P. Geiger, and P. Jonas. Fast synaptic inhibition promotes synchronized gamma oscillations in hippocampal interneuron networks. *Proceedings of the National Academy of Sciences of the United States of America*, 99(20):13222–7, oct 2002. 331–335
2. M. Bazelot, C. Dinocourt, I. Cohen, and R. Miles. Unitary inhibitory field potentials in the CA3 region of rat hippocampus. *The Journal of physiology*, 588(Pt 12):2077–90, 2010. 336–338
3. M. Bazelot, M. T. Teleńczuk, and R. Miles. Single CA3 pyramidal cells trigger sharp waves in vitro by exciting interneurons. *Journal of Physiology*, 0:1–13, 2016. 339–341
4. M. J. Bezaire and I. Soltesz. Quantitative assessment of ca1 local circuits: knowledge base for interneuron-pyramidal cell connectivity. *Hippocampus*, 23(9):751–785, 2013. 342–344
5. E. H. Buhl, S. R. Cobb, K. Halasy, and P. Somogyi. Properties of unitary IPSPs evoked by anatomically identified basket cells in the rat hippocampus. *The European journal of neuroscience*, 7(9):1989–2004, sep 1995. 345–348
6. T. H. Bullock and M. Buzsáki, GyörgyMcClune. Coherence of compound field potentials reveals discontinuities in the CA1-subiculum of the hippocampus in freely-moving rats. *Neuroscience*, 38(3):609–619, 1990. 349–351
7. G. Buzsáki. Hippocampal sharp waves: their origin and significance. *Brain research*, 398(2):242–52, nov 1986. 352–353
8. G. Buzsáki. Theta Oscillations in the Hippocampus. *Neuron*, 33(3):325–340, jan 2002. 354–355
9. G. Buzsaki, K. Wise, and Others. High-frequency network oscillation in the hippocampus. *Science*, 256(5059):1025, 1992. 356–357

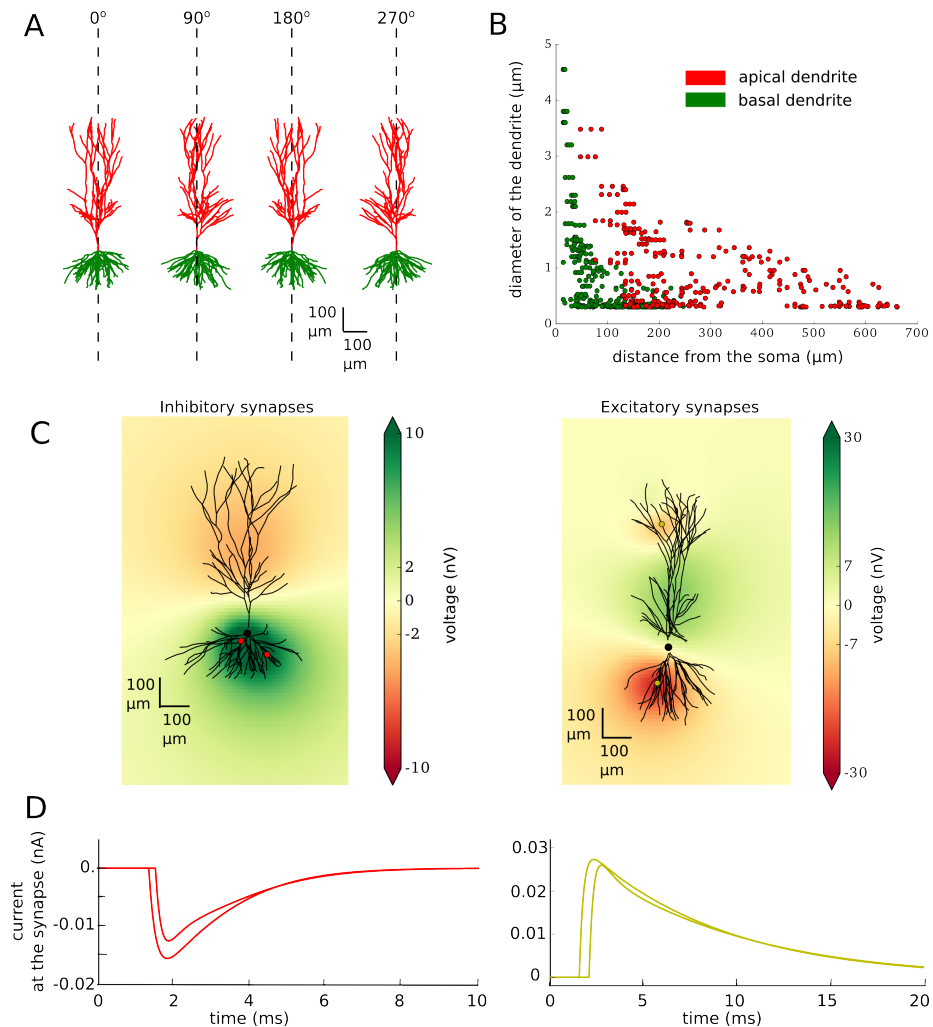

**Figure 1.** Model characteristics. **A.** Example of morphology used in the modelled population (20 different morphologies are used). All of the neurons are reconstructed uploaded by Amaral and can be downloaded from the *neuromorpho.org* (ID of the neuron shown in this figure: c81463). They are recorded in the rat CA3 area of the hippocampus. All of the neurons were translated to be vertically oriented with apical dendrites on the top and basal dendrites on the bottom. **B.** Width of the apical (red) and basal (green) dendrites as the function of their distance from the soma. **C.** Single neuron with two inhibitory (left) or two excitatory (right) synapses. Synapses are visualised as red (inhibitory) or yellow (excitatory) dots on the dendritic tree. Local field potentials is shown at 2.5 ms after beginning of the simulation (synapses were activated at 1 ms). **D.** Current at the inhibitory (left, red) and excitatory (right, yellow) synapses.

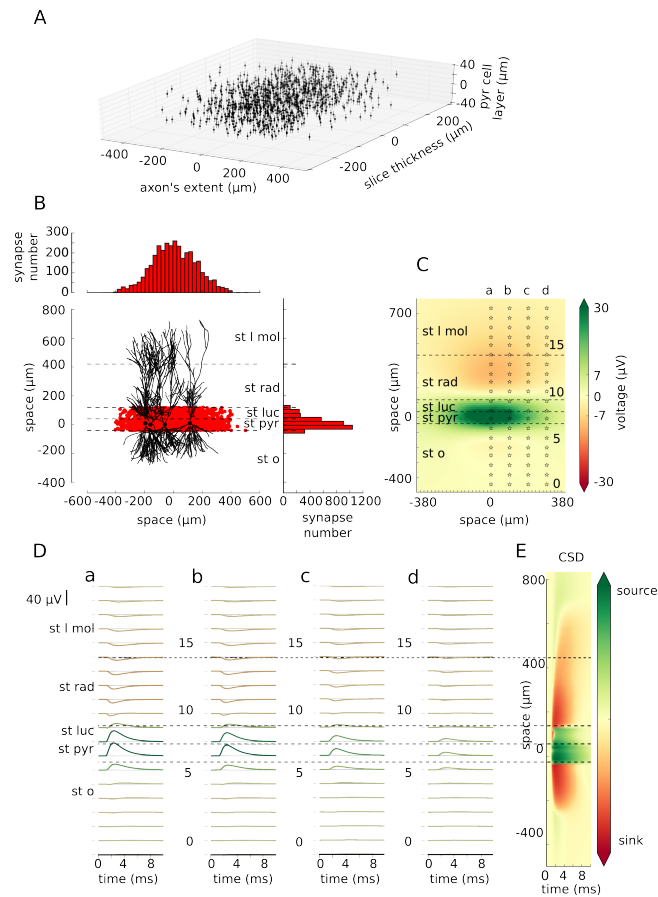

**Figure 2.** Inhibitory unitary field potential. **A.** Distribution of the postsynaptic neurons within a slice. Each dot represents a soma of one pyramidal cell. **B.** Distribution of the synapses. Each red dot shows the location of the inhibitory synapse within the length of the slice and within the hippocampal layers. 3435 inhibitory synapses were placed on the postsynaptic targets. Their distribution in both axes are shown on the top and on the right. Four, randomly selected, exemplary postsynaptic neurons with their somas indicated by black dots are drawn for better understanding of spatial relations. **C.** Local field potential at 2.5 ms from the start of the simulation (synapses were activated at 1 ms). Stars show the locations of the electrodes (0–19) with each fifth electrode marked by a number. Electrodes form 20-electrode arrays marked a–d. **D.** Traces recorded by the electrode array a–d corresponding to the locations from C. Traces are coloured by their maximum absolute peak corresponding to the colormap in (C). **E.** Current source density analysis done on the field average across the length of the axon (x direction). Layers: st l mol – *stratum lacunosum moleculare*, st rad – *stratum radiatum*, st luc – *stratum lucidum*, st pyr – *stratum pyramidale*, st o – *stratum oriens*.

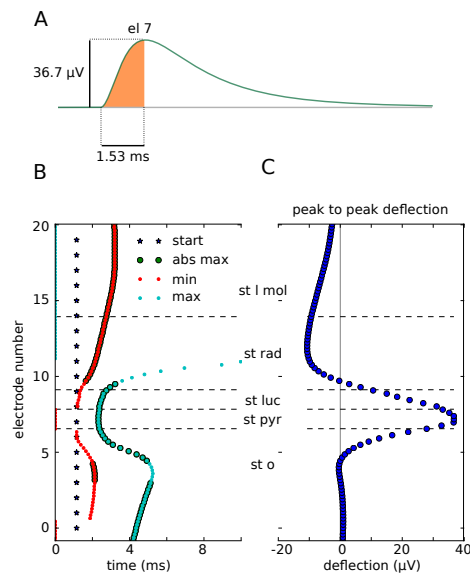

**Figure 3.** Characteristics of inhibitory uLFPs. **A.** Recording from the electrode 7, array a (location shown in Fig 2C). The area shaded in orange indicates the measurements: the amplitude of 36.7  $\mu V$  and time to peak of 1.15 ms. **B.** Stars show the beginning of the synapse activation. Time to minimum and maximum peak of each trace recorded by the array a is indicated by red and blue dots respectively. Enlarged dots indicate if the peak was absolute maximum in the trace. Time to peak vary between layers. The peak arrives the earliest (start of the rise to peak: 1.53 ms) in stratum pyramidale while it is as late as 3.05 ms in stratum moleculare (time from blue line to bold red and blue dots). **C.** Peak to peak deflection within different hippocampal layers. The highest positive peak is in stratum pyramidale but it points downwards in in stratum radiatum and stratum lacunosum moleculare

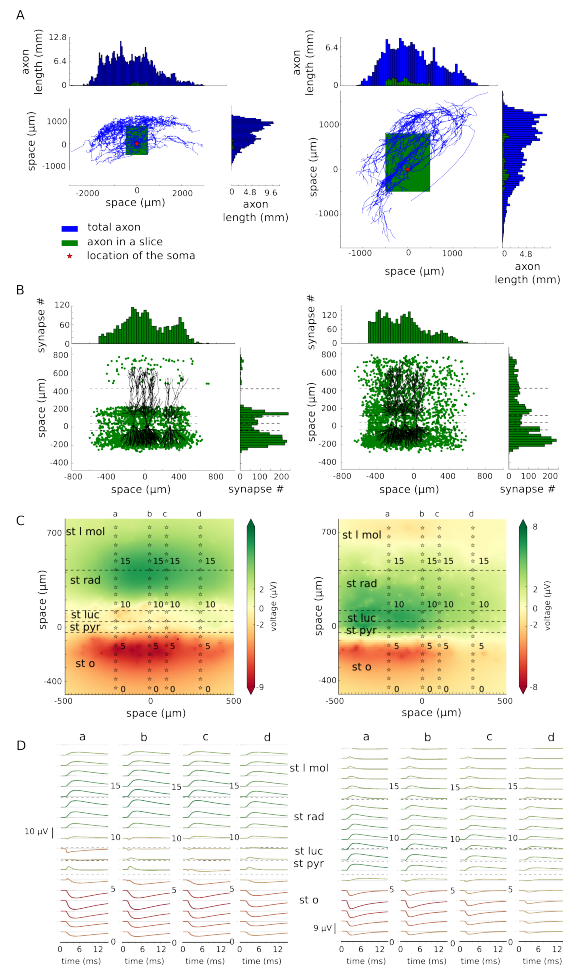

**Figure 4.** Excitatory unitary field. **A.** Axon morphologies of two CA3 pyramidal cells, Cell A (left, ID: NMO\_00187) and Cell B (ID: NMO\_00931) downloaded from *neuromorpho.org*: These cells were rotated so that their dendrites are placed vertically. Blue histograms show the length of the axon in each  $50 \mu\text{m}$  bin in two axes. Axon morphologies are indicated by blue lines with the red star showing the location of the soma. Green rectangles shows where the axon was cut consistently with the size of a typical slice ( $-500 \mu\text{m}$  to  $500 \mu\text{m}$  from the soma in the length of the slice,  $-500 \mu\text{m}$  to  $800 \mu\text{m}$  in the height and  $-200 \mu\text{m}$  to  $200 \mu\text{m}$  in the width of the slice). Green histograms show the length of the axon remaining after the cutting. **B.** The distribution of the excitatory synapses in the model for Cell A (left) and Cell B (right). The distribution follows the distributions calculated by the length of the axon in A, however with constraints given by the morphologies of the postsynaptic cell population. Four randomly chosen morphologies of postsynaptic cells were drawn for easier visualisation of the spatial relations. **C.** Local field potential plotted at  $5.5 \text{ ms}$  after beginning of the simulation with four electrode arrays (a–d) placed at  $-200$ ,  $0$ ,  $100$  and  $300 \mu\text{m}$  away from the presynaptic cell soma. **D.** Traces recorded by each of the electrode arrays marked as a–d.



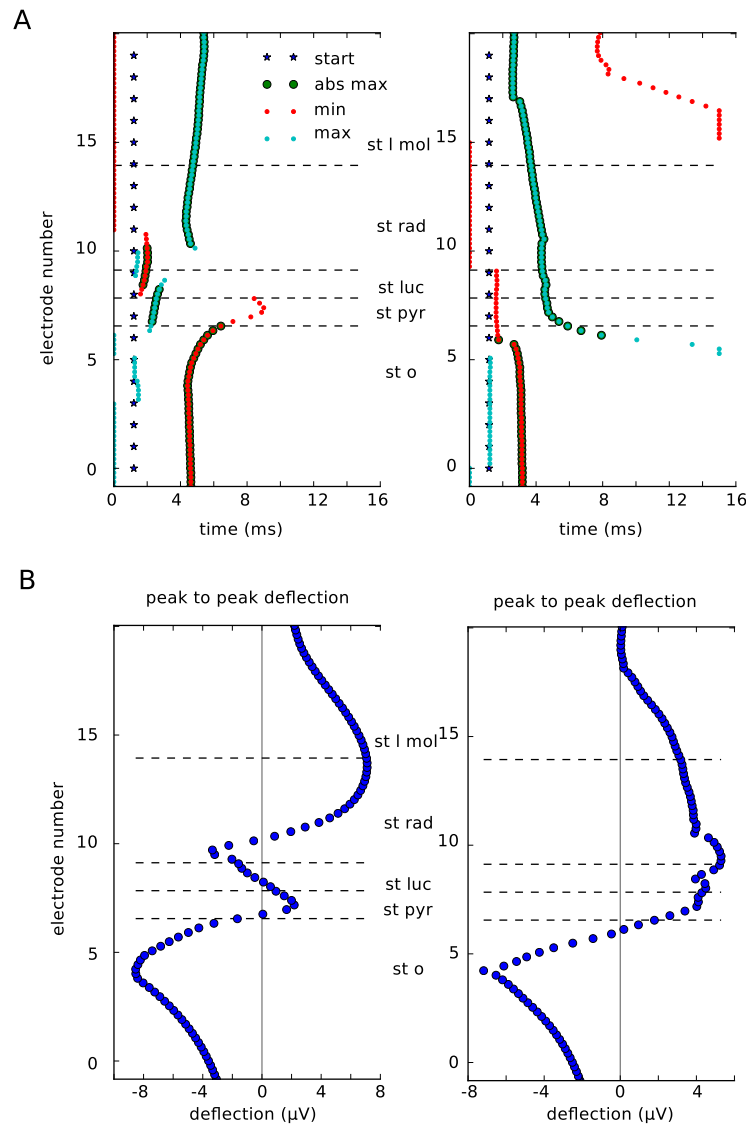

**Figure 5.** Characteristics of excitatory uLFP. Results for Cell A are on the left and for Cell B are on the right. **A.** Stars show the beginning of the synapse activation. Time to minimum and maximum peak of each trace recorded by the array b in Fig 4C ( $0 \mu\text{m}$  from the presynaptic soma) is indicated by red and blue dots respectively. Enlarged dots indicate if the peak was absolute maximum in the trace. Time to peak vary between layers. **B.** Peak to peak deflection within different hippocampal layers. It varies between the two cells (left and right).

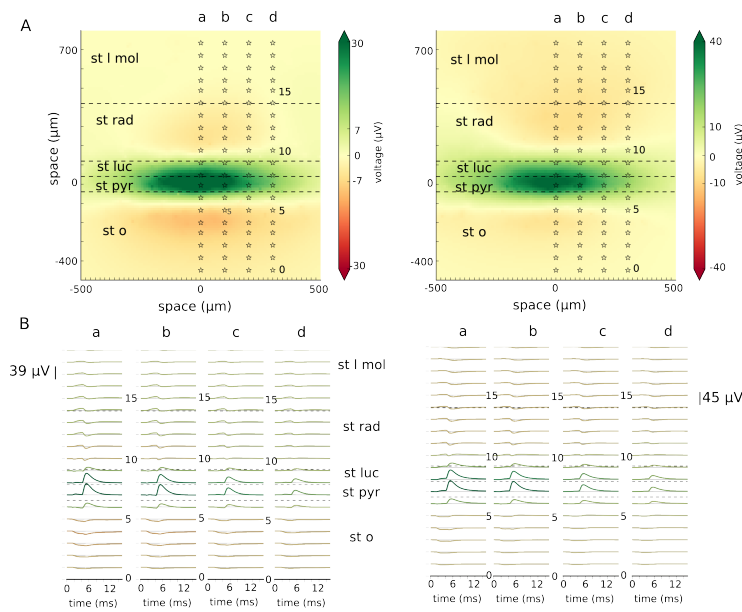

**Figure 6.** Masking of excitatory uLFP with inhibitory uLFP. Results for Cell A are on the left and for Cell B are on the right. **A.** Local field potential at time 5.5 ms from the beginning of the simulation. At time 1 ms excitatory synapses were activated (of Cell A on the left, of Cell B on the right) followed by the activation of inhibitory synapses at time 3 ms. Stars show the location of the electrodes belonging to the arrays marked a–d. **B.** Traces showing recordings from the electrode arrays marked a–d in A.

- 
10. L. L. Colgin and E. I. Moser. Gamma Oscillations in the Hippocampus. *Physiology*, 25:319–329, 2010. 358  
359
  11. J. DeFelipe and I. Fariñas. The pyramidal neuron of the cerebral cortex: morphological and chemical characteristics of the synaptic inputs. *Prog Neurobiol*, 39(6):563–607, 1992. 360  
361  
362
  12. J. R. Donoso, D. Schmitz, N. Maier, and R. Kempter. Hippocampal ripple oscillations and inhibition-first network models: Frequency dynamics and response to GABA modulators. *The Journal of Neuroscience*, 38(12):0188–17, 2018. 363  
364  
365  
366
  13. L. L. Glickfeld, J. D. Roberts, P. Somogyi, and M. Scanziani. Interneurons hyperpolarize pyramidal cells along their entire somatodendritic axis. *Nature neuroscience*, 12(1):21–3, 2009. 367  
368  
369
  14. A. I. Gulyas, R. Miles, N. Hajos, and T. F. Freund. Precision and variability in postsynaptic target selection of inhibitory cells in the hippocampal CA3 region. *European Journal of Neuroscience*, 5(12):1729–1751, 1993. 370  
371  
372
  15. S. J. Guzman, A. Schlogl, M. Frotscher, and P. Jonas. Synaptic mechanisms of pattern completion in the hippocampal CA3 network. *Science*, 353(6304):109–120, 2016. 373  
374  
375
  16. S. J. Guzman, A. Schlogl, M. Frotscher, and P. Jonas. Synaptic mechanisms of pattern completion in the hippocampal CA3 network - supplement. *Science*, 353(6304):1117–1123, 2016. 376  
377  
378
  17. E. Hagen, D. Dahmen, M. L. Stavrinou, H. Lindén, T. Tetzlaff, S. J. Van Albada, S. Grün, M. Diesmann, and G. T. Einevoll. Hybrid scheme for modeling local field potentials from point-neuron networks. *Cerebral Cortex*, 26(12):4461–4496, 2016. 379  
380  
381  
382
  18. M. L. Hines and N. T. Carnevale. The neuron simulation environment. *Neural computation*, 9(6):1179–1209, 1997. 383  
384
  19. G. R. Holt. *A critical reexamination of some assumptions and implications of cable theory in neurobiology*. PhD thesis, California Institute of Technology, 1997. 385  
386  
387
-

- 
20. N. Ishizuka, W. M. Cowan, and D. G. Amaral. A quantitative analysis of the dendritic organization of pyramidal cells in the rat hippocampus. *Journal of Comparative Neurology*, 362(1):17–45, nov 1995.
21. N. Ishizuka, J. Weber, and D. G. Amaral. Organization of intrahippocampal projections originating from CA3 pyramidal cells in the rat. *Journal of Comparative Neurology*, 295(4):580–623, 1990.
22. T. Klausberger, P. J. Magill, L. F. Márton, J. D. B. Roberts, P. M. Cobden, G. Buzsáki, and P. Somogyi. Brain-state-and cell-type-specific firing of hippocampal interneurons in vivo. *Nature*, 421(6925):844–848, 2003.
23. J. Kowalski, J. Gan, P. Jonas, and A. J. Pernía-Andrade. Intrinsic membrane properties determine hippocampal differential firing pattern in vivo in anesthetized rats. *Hippocampus*, 26(5):668–682, 2016.
24. X.-G. Li, P. Somogyi, A. Ylinen, and G. Buzsáki. The hippocampal CA3 network: an in vivo intracellularly labeling study. *Journal of Comparative Neurology*, 339(2):181–208, 1994.
25. R. Lorente de Nó. Studies on the structure of the cerebral cortex. ii. continuation of the study of the ammonic system. *Journal für Psychologie und Neurologie*, 1934.
26. N. Maier, Á. Tejero-Cantero, A. L. Dornn, J. Winterer, P. S. Beed, G. Morris, R. Kempter, J. F. A. Poulet, C. Leibold, and D. Schmitz. Coherent Phasic Excitation during Hippocampal Ripples. *Neuron*, 72(1):137–152, 2011.
27. J. P. Meeks and S. Mennerick. Action potential initiation and propagation in rat neocortical pyramidal neurons. *J Neurophysiol*, 97:3460–3472, 2007.
28. M. Megias, Z. Emri, T. Freund, and A. Gulyas. Total number and distribution of inhibitory and excitatory synapses on hippocampal ca1 pyramidal cells. *Neuroscience*, 102(3):527–540, 2001.
29. R. Miles. Synaptic excitation of inhibitory cells by single CA3 hippocampal pyramidal cells of the guinea-pig in vitro. *The Journal of physiology*, 428(1):61–77, 1990.
-

- 
30. R. Miles, K. Tóth, a. I. Gulyás, N. Hájos, and T. F. Freund. Differences 418  
between somatic and dendritic inhibition in the hippocampus. *Neuron*, 419  
16(4):815–23, apr 1996. 420
31. R. Miles and R. Wong. Unitary inhibitory synaptic potentials in the 421  
guinea-pig hippocampus in vitro. *The Journal of Physiology*, 356(1):97–  
113, 1984. 422  
423
32. T. V. Ness, M. W. H. Remme, and G. T. Einevoll. Active subthresh- 424  
old dendritic conductances shape the local field potential. *Journal of* 425  
*Physiology*, 0(1):1–31, 2016. 426
33. W. Rall and G. M. Shepherd. Theoretical reconstruction of field potentials 427  
and dendrodendritic synaptic interactions in olfactory bulb. *Journal of* 428  
*neurophysiology*, 31(6):884–915, 1968. 429
34. D. Ropireddy, R. Scorcioni, B. Lasher, G. Buzsáki, and G. a. Ascoli. Axonal 430  
Morphometry of Hippocampal Pyramidal Neurons Semi-Automatically  
Reconstructed After In-Vivo Labeling in Different CA3 Locations. *Brain* 431  
*Struct Funct*, 216(5):213–223, 2011. 432  
433
35. R. Scorcioni and G. A. Ascoli. Algorithmic reconstruction of complete 434  
axonal arborizations in rat hippocampal neurons. *Neurocomputing*, 65:15–  
22, 2005. 435  
436
36. A. Sik, N. Tamamaki, and T. F. Freund. Complete Axon Arborization of a 437  
Single CA3 Pyramidal Cell in the Rat Hippocampus, and its Relationship  
With Postsynaptic Parvalbumin???containing Interneurons. *European* 438  
*Journal of Neuroscience*, 5(12):1719–1728, 1993. 439  
440
37. B. Teleńczuk, N. Dehghani, M. L. V. Quyen, S. S. Cash, E. Halgren, N. G. 441  
Hatsopoulos, and A. Destexhe. Local field potentials primarily reflect  
inhibitory neuron activity in human and monkey cortex. *Scientific Reports*, 442  
(January):1–16, 2017. 443  
444
38. B. Telenczuk and M. Telenczuk. {NeuronEAP} library. *Zenodo*, 10.5281/ze, 445  
apr 2016. 446
39. D. Turner, X.-G. Li, G. Pyapali, A. Ylinen, and G. Buzsaki. Morphome- 447  
tric and electrical properties of reconstructed hippocampal ca3 neurons  
recorded in vivo. *Journal of Comparative Neurology*, 356(4):580–594, 1995. 448  
449
-

- 
40. X.-J. Wang and G. Buzsáki. Gamma oscillation by synaptic inhibition 450  
in a hippocampal interneuronal network model. *Journal of neuroscience*, 451  
16(20):6402–6413, 1996. 452
41. M. Wilson and J. M. Bower. Cortical oscillations and temporal interactions 453  
in a computer simulation of piriform cortex. *Journal of Neurophysiology*, 454  
67(4):981–995, 1992. 455
42. L. Wittner, D. A. Henze, L. Záborszky, and G. Buzsáki. Hippocampal 456  
CA3 pyramidal cells selectively innervate aspiny interneurons. *European* 457  
*Journal of Neuroscience*, 24(5):1286–1298, 2006. 458
43. L. Wittner, D. A. Henze, L. Záborszky, and G. Buzsáki. Three-dimensional 459  
reconstruction of the axon arbor of a CA3 pyramidal cell recorded and 460  
filled in vivo. *Brain Structure and Function*, 212(1):75–83, 2007. 461
44. A. Ylinen, A. Bragin, Z. Nádasdy, G. Jandó, I. Szabó, a. Sik, and 462  
G. Buzsáki. Sharp wave-associated high-frequency oscillation (200 Hz) 463  
in the intact hippocampus: network and intracellular mechanisms. *The* 464  
*Journal of neuroscience*, 15(1 Pt 1):30–46, jan 1995. 465
